# Supplementary material for: Clinician Barriers and Facilitators to Routine HIV Testing: A Systematic Review of the Literature
Source: PubMed Central journal article supplement — J Int Assoc Provid AIDS Care. 2020 Jun 26;19:2325958220936014. doi: 10.1177/2325958220936014 (PMC7322815; doi:10.1177/2325958220936014), 2020-06-26
Supplement: Appendix_1_SearchStringCriteria.pdf [file Appendix_1_SearchStringCriteria.pdf]

## Appendix 1: Search String Criteria

### PubMed

(barrier[tiab] OR barriers[tiab] OR problem[tiab] OR problems[tiab] OR engagement[tiab] OR acceptance[tiab] OR reluctance[tiab] OR reluctant[tiab] OR concerns[tiab] OR concern[tiab] OR stigma[tiab] OR perception[tiab] OR attitude[tiab] OR belief[tiab] OR facilitator[tiab] OR facilitate[tiab] OR facilitators[tiab] OR ease[tiab] OR encouragement[tiab] OR encourage[tiab] OR uptake[tiab]) AND ("HIV"[Mesh] OR "Acquired Immunodeficiency Syndrome"[Mesh] OR HIV[tiab] OR AIDS[tiab] OR acquired immunodeficiency syndrome[tiab] OR acquired immune deficiency syndrome[tiab]) AND ("Mass Screening"[Mesh] OR screen[tiab] OR screening[tiab] OR test[tiab] OR testing[tiab] OR ((CDC[tiab] OR USPSTF[tiab]) AND (recommendation[tiab] OR guideline[tiab]))) AND ("Physicians"[Mesh] OR "Nurses"[Mesh] OR physician[tiab] OR physicians[tiab] OR nurse[tiab] OR nurses[tiab] OR doctor[tiab] OR doctors[tiab])

### CINAHL

(barrier OR barriers OR problem OR problems OR engagement OR acceptance OR reluctance OR reluctant OR concerns OR concern OR stigma OR perception OR attitude OR belief OR facilitator OR facilitate OR facilitators OR ease OR encouragement OR encourage OR uptake ) AND (MH "Human Immunodeficiency Virus" OR MH "Acquired Immunodeficiency Syndrome" OR HIV OR AIDS OR "acquired immunodeficiency syndrome" OR "acquired immune deficiency syndrome" ) AND (screen OR screening OR test OR testing OR ((MH "Centers for Disease Control and Prevention (U.S.)" OR CDC OR MH "United States Preventive Services Task Force" OR USPSTF ) AND (recommendation OR guideline ))) AND (MH "Physicians" OR physician OR physicians OR MH "Nurses" OR nurse OR nurses OR doctor OR doctors )

### Scopus

TITLE-ABS-KEY ( ( barrier\* OR problem\* OR engagement OR acceptance OR reluctance OR reluctant OR concerns OR concern OR stigma OR perception OR attitude OR belief OR facilitator OR facilitate OR facilitators OR ease OR encouragement OR encourage OR uptake ) ) AND TITLE-ABS-KEY ((HIV OR AIDS OR "acquired immunodeficiency syndrome" OR "acquired immune deficiency syndrome" )) AND TITLE-ABS-KEY ((screen OR screening OR test OR testing OR ((CDC OR USPSTF ) AND (recommendation OR guideline )))) AND TITLE-ABS-KEY ((physician OR physicians OR nurse OR nurses OR doctor OR doctors ))

### Web of Science

**TOPIC:** ((barrier\* OR problem\* OR engagement OR acceptance OR reluctance OR reluctant OR concerns OR concern OR stigma OR perception OR attitude OR belief OR facilitator OR facilitate OR facilitators OR ease OR encouragement OR encourage OR uptake) AND (HIV OR AIDS OR "acquired immunodeficiency syndrome" OR "acquired immune deficiency syndrome")) AND (screen OR screening OR test OR testing OR ((CDC OR USPSTF ) AND

(recommendation OR guideline ))) AND (physician OR physicians OR nurse OR nurses OR doctor OR doctors )

**Refined by: LANGUAGES:** ( ENGLISH, SPANISH)

**Timespan:** 2006-present

**Indexes:** SCI-EXPANDED, SSCI, A&HCI, CPCI-S, CPCI-SSH, BKCI-S, BKCI-SSH, ESCI, CCR-EXPANDED, IC.

### **Cochrane**

(barrier\* OR facilitator\*) in Title, Abstract, Keywords and (HIV OR AIDS OR "acquired immunodeficiency syndrome" OR "acquired immune deficiency syndrome" ) and (CDC OR USPSTF) and (physician OR physicians OR nurse OR nurses OR doctor OR doctors ) in Cochrane Reviews
