# Supplementary material for: Clinician Barriers and Facilitators to Routine HIV Testing: A Systematic Review of the Literature
Source: PubMed Central journal article supplement — J Int Assoc Provid AIDS Care. 2020 Jun 26;19:2325958220936014. doi: 10.1177/2325958220936014 (PMC7322815; doi:10.1177/2325958220936014), 2020-06-26
Supplement: Appendix_3_Barriers.pdf [file Appendix_3_Barriers.pdf]

## Appendix 2: Barriers to Routine HIV Screening

| Barrier Title           | Socioecological Level | Examples                                                                                                                                                                                                                                                                                                                                                                                                                                                                                                                                                                                                                                                                                                                                                                                                                                                                                                                                                                                                                                                                                                                                                                                                                                                                                                                                                                                                                                                                                                                                                                                                                                                                                                                                                                                                                                                                                                                                                                              |
|-------------------------|-----------------------|---------------------------------------------------------------------------------------------------------------------------------------------------------------------------------------------------------------------------------------------------------------------------------------------------------------------------------------------------------------------------------------------------------------------------------------------------------------------------------------------------------------------------------------------------------------------------------------------------------------------------------------------------------------------------------------------------------------------------------------------------------------------------------------------------------------------------------------------------------------------------------------------------------------------------------------------------------------------------------------------------------------------------------------------------------------------------------------------------------------------------------------------------------------------------------------------------------------------------------------------------------------------------------------------------------------------------------------------------------------------------------------------------------------------------------------------------------------------------------------------------------------------------------------------------------------------------------------------------------------------------------------------------------------------------------------------------------------------------------------------------------------------------------------------------------------------------------------------------------------------------------------------------------------------------------------------------------------------------------------|
| Costs/<br>Reimbursement | Public Policy         | <ul style="list-style-type: none"> <li>• concern about reimbursement</li> <li>• concern about insurance coverage/out of pocket costs to patients</li> <li>• cost of the screen for undocumented immigrants</li> <li>• fear that patients would refuse based on cost</li> <li>• inadequate consideration and reimbursement for all costs involved in routine HIV testing</li> <li>• lack of American Dental Association (ADA) reimbursement code for dentists to test</li> <li>• lack of knowledge about appropriate reimbursement procedures (inability to bill for services)</li> <li>• limited number of free/reduced cost tests available</li> <li>• Medicaid will not reimburse</li> <li>• missed opportunities to obtain external federal funding to expand programs</li> <li>• patient cannot afford the test</li> <li>• rapid tests cost too much</li> <li>• additional financial burden due to increased HIV testing and diagnosis</li> <li>• competing state priorities and health needs for distribution of available funds</li> <li>• complexity and limitations of separate funding streams</li> </ul> <ul style="list-style-type: none"> <li>• concerns about sustainability of ED-based HIV</li> <li>• few programs receive special funding to test high-risk individuals due to lack of awareness</li> <li>• lack of knowledge on how to obtain funds</li> <li>• do not meet eligibility requirements to receive funding</li> <li>• increased cost of medications</li> <li>• insurance barriers for those who test positive</li> <li>• lack of financial compensation to attend trainings</li> <li>• concerns of cost effectiveness of routine testing</li> <li>• need for compensation of staff time to administer rapid test</li> <li>• fear that charging for HIV testing would be seen as "money making gimmick" for dentist</li> <li>• Medicare will not reimburse</li> <li>• decreasing testing at, and taking funds from, other health care settings</li> </ul> |

|                                                         |               |                                                                                                                                                                                                                                                                                                                                                                                                                                                                                                                                                                                                                                                                                                                                                          |                                                                                                                                                                                                                                                                                                                                                                                                                                                                                                                                                                                    |
|---------------------------------------------------------|---------------|----------------------------------------------------------------------------------------------------------------------------------------------------------------------------------------------------------------------------------------------------------------------------------------------------------------------------------------------------------------------------------------------------------------------------------------------------------------------------------------------------------------------------------------------------------------------------------------------------------------------------------------------------------------------------------------------------------------------------------------------------------|------------------------------------------------------------------------------------------------------------------------------------------------------------------------------------------------------------------------------------------------------------------------------------------------------------------------------------------------------------------------------------------------------------------------------------------------------------------------------------------------------------------------------------------------------------------------------------|
|                                                         |               | <ul style="list-style-type: none"> <li>for HIV testing and treatment</li> <li>• lack of sustainable funding</li> </ul>                                                                                                                                                                                                                                                                                                                                                                                                                                                                                                                                                                                                                                   | <ul style="list-style-type: none"> <li>• insurance barriers for those who test positive</li> </ul>                                                                                                                                                                                                                                                                                                                                                                                                                                                                                 |
| Incompatibility of Guidelines with State/Local Policies | Public Policy | <ul style="list-style-type: none"> <li>• concerns about incompatibility with state HIV testing policies (state requirement of separate written consent for testing and specified procedures required for testing)</li> <li>• need for written consent</li> <li>• requirement for consent in Belgium perpetuates HIV exceptionalism</li> <li>• separate consent necessary to test for HIV</li> <li>• state and federal regulations</li> <li>• belief that local policy or General Medical Council guidance discouraged testing</li> <li>• differences between county health department and infectious disease practice regarding delivery of test results (e.g., via telephone or in-person)</li> <li>• too many state and federal regulations</li> </ul> | <ul style="list-style-type: none"> <li>• features of larger state environment in which substance abuse and HIV testing delivery system exist</li> <li>• state requirements to provide signed consent and pretest counseling</li> <li>• differing definitions of routine testing</li> <li>• lack of support of testing from health insurance</li> <li>• informed consent requirements based on state and local regulations</li> <li>• regulations for test use are hard to understand</li> <li>• regulations related to post-test counseling for those who test positive</li> </ul> |
| Legal Issues                                            | Public Policy | <ul style="list-style-type: none"> <li>• concern with name-based reporting requirement associated with HIV testing</li> <li>• legal implications for partner notification</li> <li>• there is a lack of understanding of the legal implications of HIV testing</li> <li>• lack of understanding about legal procedures and implications for HIV testing</li> <li>• legal concerns (need to document outcomes for every patient tested, regardless of test result)</li> </ul>                                                                                                                                                                                                                                                                             | <ul style="list-style-type: none"> <li>• need for provider education on regulations and requirements</li> <li>• concern about ED liability</li> <li>• lack of awareness of local or institutional policies (notification and linkage to care)</li> <li>• lack of knowledge about Mississippi laws regarding informed consent for screening</li> </ul>                                                                                                                                                                                                                              |

|                                                    |                      |                                                                                                                                                                                                                                                                                                                                                                                                                                                                                                                                                                                                                                                                                                                                                                                                                              |                                                                                                                                                                                                                                                                                                                                                                                                                                                                                                                                                                                                                             |
|----------------------------------------------------|----------------------|------------------------------------------------------------------------------------------------------------------------------------------------------------------------------------------------------------------------------------------------------------------------------------------------------------------------------------------------------------------------------------------------------------------------------------------------------------------------------------------------------------------------------------------------------------------------------------------------------------------------------------------------------------------------------------------------------------------------------------------------------------------------------------------------------------------------------|-----------------------------------------------------------------------------------------------------------------------------------------------------------------------------------------------------------------------------------------------------------------------------------------------------------------------------------------------------------------------------------------------------------------------------------------------------------------------------------------------------------------------------------------------------------------------------------------------------------------------------|
| <p>Provider Time Constraints</p>                   | <p>Institutional</p> | <ul style="list-style-type: none"> <li>• constraints on provider's time</li> <li>• lack of time</li> <li>• lack of time to attend trainings</li> <li>• rapid pace of primary care office visits</li> <li>• time constraints due to unpredictability of ED patient volume</li> <li>• time constraints, especially when trying to justify routinely taking sexual histories and conducting HIV/STD testing efforts to health care administrators</li> <li>• time required for nurse to document HIV testing in the medical record</li> <li>• crowding of ED</li> <li>• overcrowding of wards</li> <li>• difficult to fit rapid test counseling into one session</li> <li>• difficulty of integrating the rapid testing into consultation</li> <li>• limited time with patients, especially in managed care settings</li> </ul> | <ul style="list-style-type: none"> <li>• individual provider having the responsibility for each step in the testing process</li> <li>• takes too long to run the test</li> <li>• insufficient time to conduct and interpret test</li> <li>• ED crowding with limited resources</li> <li>• ED too busy</li> <li>• challenge presented by a subset of ED patients who are high-frequency repeat HIV testers</li> <li>• perception of difficulty performing testing in the ED</li> <li>• too much paperwork</li> <li>• there are too many administrative hassles</li> <li>• rapid pace of primary care office visit</li> </ul> |
| <p>Managing Care of Patients Who Test Positive</p> | <p>Institutional</p> | <ul style="list-style-type: none"> <li>• concern about how to manage care of an HIV positive patient</li> <li>• concern over linking patient to care</li> <li>• difficult to arrange follow-up for patients with positive result</li> <li>• health service system silos (no infrastructure for coordinating services, no incentives for coordination, no central referral system)</li> <li>• lack of contacts for follow-up referrals</li> </ul>                                                                                                                                                                                                                                                                                                                                                                             | <ul style="list-style-type: none"> <li>• limited intra- and inter-agency communication (no shared responsibility, no shared patient information, no shared data collection, little shared knowledge and training)</li> <li>• difficulty obtaining treatment medications</li> <li>• poor primary and secondary care</li> </ul>                                                                                                                                                                                                                                                                                               |

|                                |               |                                                                                                                                                                                                                                                                                                                                                                                                                                                                                                                                                                                                                                                                                                                                                                                                    |                                                                                                                                                                                                                                                                                                                                                                                                                                                                                                                         |
|--------------------------------|---------------|----------------------------------------------------------------------------------------------------------------------------------------------------------------------------------------------------------------------------------------------------------------------------------------------------------------------------------------------------------------------------------------------------------------------------------------------------------------------------------------------------------------------------------------------------------------------------------------------------------------------------------------------------------------------------------------------------------------------------------------------------------------------------------------------------|-------------------------------------------------------------------------------------------------------------------------------------------------------------------------------------------------------------------------------------------------------------------------------------------------------------------------------------------------------------------------------------------------------------------------------------------------------------------------------------------------------------------------|
|                                |               | <ul style="list-style-type: none"> <li>• lack of coordination across settings (e.g., "attending one hospital for one thing and another" for something else)</li> <li>• barriers with linkage to care (few HIV care providers available, patients have to travel long distances for treatment and care)</li> <li>• lack of HIV treatment resources in the community</li> <li>• lack of HIV-related referral networks</li> <li>• lack of medical/social services linkages</li> <li>• lack of data to identify appropriate facilities</li> <li>• lack of medical or social service linkages</li> <li>• lack of resources in rural areas for referring patients for HIV care (closest specialist over 100 miles away)</li> <li>• unsure how to provide follow-up for a positive test result</li> </ul> | <ul style="list-style-type: none"> <li>interface (lack of models of shared care, missed opportunities for shared care)</li> <li>• lack of external partnerships</li> <li>• few HIV care providers available</li> <li>• lack of feedback from hospitals about patients who test positive</li> <li>• unwillingness of infectious disease practice to follow-up with patients who tested positive in the ED</li> <li>• lack of knowledge where to refer HIV-infected patients</li> <li>• lack of follow up care</li> </ul> |
| Concerns about Confidentiality | Institutional | <ul style="list-style-type: none"> <li>• concern about confidentiality with HIV testing</li> <li>• confidentiality cannot be guaranteed in small communities</li> <li>• lack of privacy for conducting HIV testing</li> <li>• fears that confidentiality is easily breached, especially in overcrowded environments</li> <li>• fears of confidentiality with billing</li> <li>• lack of anonymity in rural areas</li> </ul>                                                                                                                                                                                                                                                                                                                                                                        | <ul style="list-style-type: none"> <li>• patient fear of lack of confidentiality</li> <li>• interruptions by other staff during testing</li> <li>• patients uncomfortable being asked HIV status at triage</li> <li>• patients do not feel that screening at triage is private</li> <li>• belief that patients prefer anonymous testing and would not want dentist to know of status</li> </ul>                                                                                                                         |

|                                         |               |                                                                                                                                                                                                                                                                                                                                                                                                                                                                                                                                              |                                                                                                                                                                                                                                                                                                                                                                                                                                                                                                                         |
|-----------------------------------------|---------------|----------------------------------------------------------------------------------------------------------------------------------------------------------------------------------------------------------------------------------------------------------------------------------------------------------------------------------------------------------------------------------------------------------------------------------------------------------------------------------------------------------------------------------------------|-------------------------------------------------------------------------------------------------------------------------------------------------------------------------------------------------------------------------------------------------------------------------------------------------------------------------------------------------------------------------------------------------------------------------------------------------------------------------------------------------------------------------|
|                                         |               | <ul style="list-style-type: none"> <li>• lack of private space in jail setting</li> <li>• lack of clinical space to conduct confidential screening</li> </ul>                                                                                                                                                                                                                                                                                                                                                                                | <ul style="list-style-type: none"> <li>• logistics of test performance and counseling on the ward (issue of patient privacy)</li> </ul>                                                                                                                                                                                                                                                                                                                                                                                 |
| Staffing Shortage                       | Institutional | <ul style="list-style-type: none"> <li>• personnel needed to administer tests and follow-up with test result</li> <li>• poor organizational structure</li> <li>• resource constraints (inadequate staff for testing, follow-up, and support)</li> <li>• staffing shortages</li> <li>• strain on staff when others are absent to attend trainings</li> <li>• department does not have sufficient number of staff</li> <li>• fear of a "surge" in patients coming to the ED only for HIV testing</li> <li>• lack of male counselors</li> </ul> | <ul style="list-style-type: none"> <li>• not having a health care team of support</li> <li>• potential for increase in appointments for delivery of in-person test results</li> <li>• high staff turnover</li> <li>• staffing constraints</li> <li>• lack of sufficient staff to give rapid test</li> <li>• non-laboratory staff are not qualified to run rapid test</li> <li>• department does not have sufficient number of staff</li> <li>• organization unable to employ dedicated staff to perform test</li> </ul> |
| Difficulty Following-up on Test Results | Institutional | <ul style="list-style-type: none"> <li>• difficulty contacting patients for results</li> <li>• no system in place for follow-up on results</li> <li>• patients not waiting or returning for test results</li> <li>• short-stay treatment clients may be discharged before receiving test results</li> <li>• concern with follow-up</li> <li>• transient population treated in ED</li> <li>• wait time for receipt of test results</li> <li>• failure to follow up on result</li> </ul>                                                       | <ul style="list-style-type: none"> <li>• process concerns - obtaining confirmatory testing</li> <li>• patient unwillingness to wait 2 weeks for test results</li> <li>• difficulty obtaining test results</li> <li>• rapid testing does not allow more people to know their HIV status (need for confirmatory test)</li> <li>• lack of resources to follow-up with</li> </ul>                                                                                                                                           |

|                              |               |                                                                                                                                                                                                                                                                                                                                                                                                                                                                                                                                                                                                                                                                                         |                                                                                                                                                                                                                                                                                                                                                                                                                                                                                                                                                                       |
|------------------------------|---------------|-----------------------------------------------------------------------------------------------------------------------------------------------------------------------------------------------------------------------------------------------------------------------------------------------------------------------------------------------------------------------------------------------------------------------------------------------------------------------------------------------------------------------------------------------------------------------------------------------------------------------------------------------------------------------------------------|-----------------------------------------------------------------------------------------------------------------------------------------------------------------------------------------------------------------------------------------------------------------------------------------------------------------------------------------------------------------------------------------------------------------------------------------------------------------------------------------------------------------------------------------------------------------------|
|                              |               | <ul style="list-style-type: none"> <li>• lack of confidence that patients will return for results</li> <li>• system of scheduling patient follow-up is lacking</li> <li>• patient failure to return for results</li> <li>• patients tend to follow-up at another center</li> <li>• need for second test if rapid test is positive</li> </ul>                                                                                                                                                                                                                                                                                                                                            | <p>patients who tested negative</p> <ul style="list-style-type: none"> <li>• lack of feedback from hospitals about patients who receive a positive result</li> <li>• follow up difficulty is a key barrier to STD and HIV screening in EDs, especially for HIV</li> </ul>                                                                                                                                                                                                                                                                                             |
| Materials Needed for Testing | Institutional | <ul style="list-style-type: none"> <li>• lack of availability of HIV testing on site</li> <li>• lack of lab access or services</li> <li>• lack of test kits</li> <li>• test kits out of stock</li> <li>• rapid testing not available</li> <li>• delayed delivery of products</li> <li>• hard to find written HIV test consent form</li> <li>• lack of HIV consent forms</li> <li>• non-rapid testing not available</li> <li>• unavailability of personal protective equipment (masks, goggles, and aprons)</li> <li>• difficulty to screen for other STIs with a rapid diagnostic test</li> <li>• resources and acceptability differ according to the type of test available</li> </ul> | <ul style="list-style-type: none"> <li>• shortage of resources</li> <li>• rapid test supply shortage</li> <li>• lack of resources for prevention and testing</li> <li>• resource constraints</li> <li>• lack of facilities</li> <li>• lack of open access to testing services or community support resources</li> <li>• unavailability of same-day testing</li> <li>• inadequate resources</li> <li>• insufficient resources for rapid testing</li> <li>• on-site testing not universally available through Mississippi substance abuse treatment programs</li> </ul> |
| Clinical Inertia             | Institutional | <ul style="list-style-type: none"> <li>• inertia of previous practice</li> <li>• lack of habit of testing</li> <li>• clinical inertia</li> <li>• lack of staff initiative</li> <li>• clinic does not have a routine HIV screening system</li> </ul>                                                                                                                                                                                                                                                                                                                                                                                                                                     | <ul style="list-style-type: none"> <li>• lack of integration of screening into practice</li> <li>• lack of models operationalizing HIV testing</li> </ul>                                                                                                                                                                                                                                                                                                                                                                                                             |

|                                |               |                                                                                                                                                                                                                                                                                                                                                                                                                                                                                                                                                                                                                                  |                                                                                                                                                                                                                                                                                                                                                                                                                                                                                                         |
|--------------------------------|---------------|----------------------------------------------------------------------------------------------------------------------------------------------------------------------------------------------------------------------------------------------------------------------------------------------------------------------------------------------------------------------------------------------------------------------------------------------------------------------------------------------------------------------------------------------------------------------------------------------------------------------------------|---------------------------------------------------------------------------------------------------------------------------------------------------------------------------------------------------------------------------------------------------------------------------------------------------------------------------------------------------------------------------------------------------------------------------------------------------------------------------------------------------------|
|                                |               | <ul style="list-style-type: none"> <li>• difficult to design a testing protocol for the organization</li> <li>• doctors do not screen for diseases they rarely see</li> <li>• health provider resistance</li> <li>• historical delineation between sites of HIV testing and clinical care (providers not used to offering HIV testing unless the patient requested)</li> <li>• internal processes and decision-making</li> </ul>                                                                                                                                                                                                 | <ul style="list-style-type: none"> <li>• intermittent office staff compliance with the new routine sexual history procedures</li> <li>• clinical reminders overload</li> <li>• delayed integration of new responsibilities with existing responsibilities</li> <li>• no uniformity in collecting data</li> </ul>                                                                                                                                                                                        |
| Lack of Administrative Support | Institutional | <ul style="list-style-type: none"> <li>• health care facility resistance</li> <li>• hesitation of hospital administration</li> <li>• HIV testing prohibited in practice</li> <li>• hospital administration does not support use</li> <li>• no shared goals or leadership</li> <li>• lack of a clinical champion</li> <li>• attendance at trainings deemed optional by administrators</li> <li>• lack of institutional guidelines</li> <li>• program culture</li> <li>• barriers are clinic-setting specific and not amenable to a general approach (rural vs. urban, ethnic mix, HIV risk and incidence in community)</li> </ul> | <ul style="list-style-type: none"> <li>• lack of participation of other professionals in training</li> <li>• difficulty justifying to administrators the importance of taking sexual history and provide HIV/STD testing</li> <li>• hospital administration does not support use of rapid HIV test</li> <li>• leadership resistance</li> <li>• culture changes required of inpatient caregivers and hospital administrators</li> <li>• practice policies not consistent with recommendations</li> </ul> |

|                                                        |                      |                                                                                                                                                                                                                                                                                                                                                                                                                                                                                                                                                                                                                                                                                                                                                                                                                                                                                                                                                                                                                                                                              |                                                                                                                                                                                                                                                                                                                                                                                                                                                                                                                                                                                                                                                                                                                           |
|--------------------------------------------------------|----------------------|------------------------------------------------------------------------------------------------------------------------------------------------------------------------------------------------------------------------------------------------------------------------------------------------------------------------------------------------------------------------------------------------------------------------------------------------------------------------------------------------------------------------------------------------------------------------------------------------------------------------------------------------------------------------------------------------------------------------------------------------------------------------------------------------------------------------------------------------------------------------------------------------------------------------------------------------------------------------------------------------------------------------------------------------------------------------------|---------------------------------------------------------------------------------------------------------------------------------------------------------------------------------------------------------------------------------------------------------------------------------------------------------------------------------------------------------------------------------------------------------------------------------------------------------------------------------------------------------------------------------------------------------------------------------------------------------------------------------------------------------------------------------------------------------------------------|
| <p>Logistical Difficulties</p>                         | <p>Institutional</p> | <ul style="list-style-type: none"> <li>• logistical difficulties caused by adding screening to the visit and negative impact of work-flow</li> <li>• rapid tests are difficult to integrate into the laboratory</li> <li>• delay between training and the start of testing activities hindered or prevented nurses and physicians from providing HIV rapid test</li> <li>• delayed integration of new responsibilities with existing responsibilities with introduction of rapid testing</li> <li>• different locations for HIV testing and primary care</li> <li>• patients accustomed to having blood tests performed in a lab as impediment to rapid testing</li> <li>• inconvenient off-site referrals for HIV testing</li> <li>• health system silos</li> <li>• difficulties navigating through health care system</li> <li>• the difficulty of integrating the rapid diagnostics test</li> <li>• longer wait times for patients</li> <li>• lack of coordination across settings (e.g., attending one hospital for one thing and another for something else)</li> </ul> | <ul style="list-style-type: none"> <li>• the difficulty of integrating the rapid diagnostic test</li> <li>• clinical reminders overload</li> <li>• difficult to design protocols for the organization</li> <li>• poor primary and secondary care interface (lack of model of shared care, missed opportunities for shared care)</li> <li>• chaotic commissioning model</li> <li>• lack of support resources and language services for newcomers</li> <li>• lack of political will and funding for immigrant health services</li> <li>• failure to integrate care with support organizations</li> <li>• different locations for HIV testing and primary care</li> <li>• lack of reminder for HIV testing in EMR</li> </ul> |
| <p>Need for Patient-Friendly Educational Materials</p> | <p>Institutional</p> | <ul style="list-style-type: none"> <li>• absence of patient-friendly literature</li> <li>• pamphlets not addressing older adults</li> <li>• lack of health education for patients</li> <li>• pamphlets not addressing older adults</li> </ul>                                                                                                                                                                                                                                                                                                                                                                                                                                                                                                                                                                                                                                                                                                                                                                                                                                | <ul style="list-style-type: none"> <li>• lack of awareness of information available to patients</li> <li>• ignorance of rapid testing among patients</li> </ul>                                                                                                                                                                                                                                                                                                                                                                                                                                                                                                                                                           |



|                            |               |                                                                                                                                                                                                                                                                                                                                                                                                                                                                                                                                                                                                                                                                                                                                                                                                                                                  |                                                                                                                                                                                                                                                                                                                                                                                                                                                                                                                                                                                                                                                                                                 |
|----------------------------|---------------|--------------------------------------------------------------------------------------------------------------------------------------------------------------------------------------------------------------------------------------------------------------------------------------------------------------------------------------------------------------------------------------------------------------------------------------------------------------------------------------------------------------------------------------------------------------------------------------------------------------------------------------------------------------------------------------------------------------------------------------------------------------------------------------------------------------------------------------------------|-------------------------------------------------------------------------------------------------------------------------------------------------------------------------------------------------------------------------------------------------------------------------------------------------------------------------------------------------------------------------------------------------------------------------------------------------------------------------------------------------------------------------------------------------------------------------------------------------------------------------------------------------------------------------------------------------|
| Quality Assurance Concerns | Institutional | <ul style="list-style-type: none"> <li>• ensuring quality control and traceability of results adding to time and expense</li> <li>• quality assurance procedures are too complex</li> <li>• HIV screening not included in performance measures</li> <li>• lack of institutional benchmarks for HIV testing</li> </ul>                                                                                                                                                                                                                                                                                                                                                                                                                                                                                                                            | <ul style="list-style-type: none"> <li>• no uniformity in collecting data</li> <li>• requirements for testing site quality assurance and policies</li> <li>• complexity of quality assurance procedures for rapid testing</li> </ul>                                                                                                                                                                                                                                                                                                                                                                                                                                                            |
| Administrative Burden      | Institutional | <ul style="list-style-type: none"> <li>• administrative burden</li> <li>• managing data and paperwork associated with screening</li> </ul>                                                                                                                                                                                                                                                                                                                                                                                                                                                                                                                                                                                                                                                                                                       | <ul style="list-style-type: none"> <li>• paperwork is too cumbersome</li> <li>• there are too many administrative hassles</li> </ul>                                                                                                                                                                                                                                                                                                                                                                                                                                                                                                                                                            |
| Stigma                     | Interpersonal | <ul style="list-style-type: none"> <li>• stigma</li> <li>• difficulty normalizing a highly stigmatized disease</li> <li>• fear that positive screen result would cause stigma for patient</li> <li>• HIV exceptionalized as a condition due to stigma has led to screening in specialist settings</li> <li>• stigma (do not want to offer screen without clinical reason to do so)</li> <li>• stigma associated with being seen as a provider who offers HIV testing (patients might assume that there are substantial numbers of at-risk individuals being seen at the practice)</li> <li>• refusal of testing at local health departments due to stigma</li> <li>• community perceptions regarding HIV testing in ED</li> <li>• community resistance</li> <li>• concerns about judging patients' sexual behavior and raising stigma</li> </ul> | <ul style="list-style-type: none"> <li>• patient would perceive the proposition to test as an accusation of sexual promiscuity</li> <li>• perception that recommending a screen would suggest judgment of patient's fidelity to relationship</li> <li>• conservative nature of communities</li> <li>• Arkansas is part of the Bible Belt with conservative moral values and politics</li> <li>• HIV-related stigma</li> <li>• HIV and substance abuse associated with moral weakness and shameful behavior</li> <li>• belief that patients prefer anonymous testing and would not want dentist to know of status</li> <li>• community and patient attitudes of denial, fear, stigma,</li> </ul> |

|                                                         |               |                                                                                                                                                                                                                                                                                                                                                                                                                                                                                                                                                                                                                                                                                                     |                                                                                                                                                                                                                                                                                                                                                                                                                                                                                                                           |
|---------------------------------------------------------|---------------|-----------------------------------------------------------------------------------------------------------------------------------------------------------------------------------------------------------------------------------------------------------------------------------------------------------------------------------------------------------------------------------------------------------------------------------------------------------------------------------------------------------------------------------------------------------------------------------------------------------------------------------------------------------------------------------------------------|---------------------------------------------------------------------------------------------------------------------------------------------------------------------------------------------------------------------------------------------------------------------------------------------------------------------------------------------------------------------------------------------------------------------------------------------------------------------------------------------------------------------------|
|                                                         |               | <ul style="list-style-type: none"> <li>• patient may view recommendation as accusatory or judgmental</li> <li>• lack of public acceptance</li> <li>• lack of community acceptance of HIV testing</li> <li>• fear related to the effect of positive status would have on life insurance/immigration/work</li> <li>• patient's fear of including HIV positive status on medical records</li> <li>• patient afraid to disclose sexual risk behaviors to provider</li> <li>• fear that patients would accuse provider of xenophobia and would perceive the proposition to test as an accusation of sexual promiscuity</li> <li>• patient may view recommendation as accusatory or judgmental</li> </ul> | <p>and discrimination associated with HIV</p> <ul style="list-style-type: none"> <li>• patient would not want to be identified as HIV positive</li> <li>• afraid others will find out</li> <li>• providers do not want to offend anyone</li> <li>• fear of uncomfortable interactions with patients</li> <li>• HIV-related stigma might deter patients from dental care</li> <li>• difficulty normalizing a highly stigmatized disease</li> <li>• patients with a positive test would be rejected by community</li> </ul> |
| Culture/ Language/ Sexual Orientation/ Gender/Race/ Age | Interpersonal | <ul style="list-style-type: none"> <li>• cultural barriers (Latinas - lack of assertiveness in sexual relationships)</li> <li>• cultural differences between provider and patient</li> <li>• religious factors impede discussions about HIV</li> <li>• language barrier</li> <li>• differences in sexual orientation between provider and patient</li> <li>• difficult to explain rapid tests to patients with low literacy skills</li> <li>• perception that males less likely to get tested</li> <li>• cultural/social/religious factors impede discussions about HIV</li> </ul>                                                                                                                  | <ul style="list-style-type: none"> <li>• uncomfortable due to religious, spiritual or cultural beliefs</li> <li>• difference in age between patient and provider</li> <li>• difference in culture</li> <li>• difference in language</li> <li>• gender differences between patient and provider</li> <li>• differences in sexual orientation between patient and provider</li> <li>• perception that men are reluctant to go</li> </ul>                                                                                    |

|                                                    |               |                                                                                                                                                                                                                                                                                                                                                                                                                                                  |                                                                                                                                                                                                                                                                                                                                                  |
|----------------------------------------------------|---------------|--------------------------------------------------------------------------------------------------------------------------------------------------------------------------------------------------------------------------------------------------------------------------------------------------------------------------------------------------------------------------------------------------------------------------------------------------|--------------------------------------------------------------------------------------------------------------------------------------------------------------------------------------------------------------------------------------------------------------------------------------------------------------------------------------------------|
|                                                    |               | <ul style="list-style-type: none"> <li>• difficulty with cultural competency in communication with immigrant patients</li> <li>• patients' young age</li> <li>• patient's sexual orientation</li> <li>• lack of sensitive culturally appropriate health care, including HIV testing services</li> </ul>                                                                                                                                          | <ul style="list-style-type: none"> <li>• for testing (and to seek healthcare in general)</li> <li>• discomfort due to religious, spiritual, or cultural beliefs</li> <li>• difficulty talking about HIV or sex in the South ("Bible Belt")</li> </ul>                                                                                            |
| Difficulty Testing Adolescents                     | Interpersonal | <ul style="list-style-type: none"> <li>• discomfort taking a sexual history when parents present</li> <li>• parental consent needed for children and adolescents</li> <li>• consent should be obtained from parent or guardian</li> <li>• staff thought that parents and guardians would refuse screening</li> <li>• concerns about ability of children to give consent</li> <li>• difficulty testing minors when parents are present</li> </ul> | <ul style="list-style-type: none"> <li>• fears of how child would be treated if tested positive</li> <li>• guardian deemed HIV testing to be inappropriate</li> <li>• laws requiring providers to inform parents of teens younger than 14 if they test positive</li> <li>• inability to identify which adolescents should be screened</li> </ul> |
| Lack of Established Patient-Provider Relationship  | Interpersonal | <ul style="list-style-type: none"> <li>• lack of established patient-provider relationship</li> <li>• lack of patient-provider rapport with new patients</li> <li>• patient being seen by someone other than regular provider</li> </ul>                                                                                                                                                                                                         | <ul style="list-style-type: none"> <li>• lack of trust with patient</li> <li>• provider-initiated testing and counseling may affect the trust between patient and professional</li> </ul>                                                                                                                                                        |
| Patient Discomfort Discussing HIV and Risk Factors | Interpersonal | <ul style="list-style-type: none"> <li>• patient uncomfortable discussing high risk behaviors</li> <li>• patients may feel that requesting an HIV equates to admission of having done something "naughty"</li> <li>• patients unwilling to disclose risk behaviors</li> </ul>                                                                                                                                                                    | <ul style="list-style-type: none"> <li>• patients would not feel comfortable discussing HIV, sexual behavior, or drug use with provider</li> <li>• personal relationship with patient (feeling that patient would not want them to know)</li> </ul>                                                                                              |
| Family and Partner Dynamics                        | Interpersonal | <ul style="list-style-type: none"> <li>• patients in need of comforting when children</li> </ul>                                                                                                                                                                                                                                                                                                                                                 | <ul style="list-style-type: none"> <li>• concerns about disease or death and</li> </ul>                                                                                                                                                                                                                                                          |

|                                               |               |                                                                                                                                                                                                                                                                                                                                                                                                                                                                                                                                                                                                                                                                                                                                                                                                                                                                                                                                               |                                                                                                                                                                                                                                                                                                                                                                                                                                                                                                                                                                                                                                                                                                                                        |
|-----------------------------------------------|---------------|-----------------------------------------------------------------------------------------------------------------------------------------------------------------------------------------------------------------------------------------------------------------------------------------------------------------------------------------------------------------------------------------------------------------------------------------------------------------------------------------------------------------------------------------------------------------------------------------------------------------------------------------------------------------------------------------------------------------------------------------------------------------------------------------------------------------------------------------------------------------------------------------------------------------------------------------------|----------------------------------------------------------------------------------------------------------------------------------------------------------------------------------------------------------------------------------------------------------------------------------------------------------------------------------------------------------------------------------------------------------------------------------------------------------------------------------------------------------------------------------------------------------------------------------------------------------------------------------------------------------------------------------------------------------------------------------------|
|                                               |               | <p>were brought along to the consultation</p> <ul style="list-style-type: none"> <li>• partner of the patient being present</li> <li>• mother or other relative being present at the time of a patient visit</li> <li>• lack of childcare facilities at the clinic</li> <li>• difficulty figuring out family dynamics</li> </ul>                                                                                                                                                                                                                                                                                                                                                                                                                                                                                                                                                                                                              | <p>effect of positive status on family or fear of having children</p> <ul style="list-style-type: none"> <li>• unwillingness or inability to contemplate the potential impact on an HIV diagnosis on a long-standing relationship</li> </ul>                                                                                                                                                                                                                                                                                                                                                                                                                                                                                           |
| Pre-/Post-Test Counseling and Consent Process | Intrapersonal | <ul style="list-style-type: none"> <li>• concerns about the pre-test discussion</li> <li>• increased time requirements due to pretest and posttest counseling</li> <li>• time constraints (concerns about time for counseling and education, completing necessary paperwork to obtain consent)</li> <li>• time management (pre/post-test counseling adds to consultation time)</li> <li>• time needed to discuss sexual practices and disorders</li> <li>• time required to obtain testing consent and provide counseling (lack of awareness of California state legislature removal of requirement for signed consent and counseling)</li> <li>• time necessary to complete separate written consent</li> <li>• unsure how to perform consent procedures</li> <li>• consent process too time-consuming/burdensome</li> <li>• onerous consent process</li> <li>• overly burdensome state pretest consent and counseling guidelines</li> </ul> | <ul style="list-style-type: none"> <li>• lack of experience providing pre-test or risk reduction counseling</li> <li>• need for pre-test counseling</li> <li>• need to have a conversation with the patient about HIV testing (not just "checking off a box on a lab slip and handing it to a patient")</li> <li>• not trained to perform pre-test counseling</li> <li>• counseling is hard to integrate with other client services</li> <li>• additional time needed to assess who needs testing</li> <li>• difficulty of accurately identifying those ED patients who are at greatest risk for HIV and most likely to have an undiagnosed infection</li> <li>• inability to identify which adolescents should be screened</li> </ul> |

|                               |               |                                                                                                                                                                                                                                                                                                                                                                                                                                                                                                                                                                                                                                                                                                                                                                                                                                                                                                                      |                                                                                                                                                                                                                                                                                                                                                                                                                                                                                                                                                                                                                                     |
|-------------------------------|---------------|----------------------------------------------------------------------------------------------------------------------------------------------------------------------------------------------------------------------------------------------------------------------------------------------------------------------------------------------------------------------------------------------------------------------------------------------------------------------------------------------------------------------------------------------------------------------------------------------------------------------------------------------------------------------------------------------------------------------------------------------------------------------------------------------------------------------------------------------------------------------------------------------------------------------|-------------------------------------------------------------------------------------------------------------------------------------------------------------------------------------------------------------------------------------------------------------------------------------------------------------------------------------------------------------------------------------------------------------------------------------------------------------------------------------------------------------------------------------------------------------------------------------------------------------------------------------|
|                               |               | <ul style="list-style-type: none"> <li>• concern that pre-test counseling fails to adequately prepare patients for a positive results</li> <li>• inadequate counseling</li> <li>• inadequate support staff for counseling</li> <li>• inadequate training in pre-test counseling</li> <li>• unsure how to perform counseling</li> <li>• separate consent necessary for HIV test</li> <li>• regulations related to counseling (post-test for those who test positive and perception that pre-test counseling is also required)</li> <li>• inadequate counseling for repeated testers</li> <li>• counseling session is difficult to integrate with other patient services</li> <li>• informed consent is hard to obtain</li> <li>• difficult to fit rapid test counseling into one session</li> <li>• concern that condensing pre-test counseling fails to adequately prepare patients for a positive result</li> </ul> | <ul style="list-style-type: none"> <li>• lack of training to assess risk behaviors</li> <li>• belief that many components of pretest counseling are inappropriate for the majority of women</li> <li>• if HIV testing increased there might be weakened possibilities to give pre-test counseling properly</li> <li>• lack of HIV consent forms</li> <li>• need for prescreen counseling</li> <li>• requirements for written informed consent</li> <li>• parental consent needed for children/adolescents</li> <li>• too many state and federal regulations for rapid test and consent requirements for parents' consent</li> </ul> |
| Competing Clinical Priorities | Intrapersonal | <ul style="list-style-type: none"> <li>• competing clinical priorities</li> <li>• guidelines recommend 1-time HIV screening for most patients within broad age range reduces the urgency for performing screening in any given clinic visit</li> <li>• prioritizing substance abuse treatment over HIV testing in substance abuse clinics</li> <li>• not feasible or desirable to adopt provider-initiated counseling and testing</li> </ul>                                                                                                                                                                                                                                                                                                                                                                                                                                                                         | <ul style="list-style-type: none"> <li>• risk of fatigue among staff with responsibilities to perform related tasks (offering, charting, education, and following-up)</li> <li>• staff resistance (one more task to undertake, outside scope of practice)</li> <li>• wish to focus on primary complaint</li> </ul>                                                                                                                                                                                                                                                                                                                  |

|                                                  |               |                                                                                                                                                                                                                                                                                                                                                                                                                                                                                                                                                                                                                                                                                                                            |                                                                                                                                                                                                                                                                                                                                                                                                                                                                                                     |
|--------------------------------------------------|---------------|----------------------------------------------------------------------------------------------------------------------------------------------------------------------------------------------------------------------------------------------------------------------------------------------------------------------------------------------------------------------------------------------------------------------------------------------------------------------------------------------------------------------------------------------------------------------------------------------------------------------------------------------------------------------------------------------------------------------------|-----------------------------------------------------------------------------------------------------------------------------------------------------------------------------------------------------------------------------------------------------------------------------------------------------------------------------------------------------------------------------------------------------------------------------------------------------------------------------------------------------|
|                                                  |               | <p>during all types of consultations</p> <ul style="list-style-type: none"> <li>• not thinking of HIV screening in encounter</li> <li>• organization unable to employ dedicated staff to perform testing</li> <li>• other health screenings (e.g., medical history, vital signs, BMI, substance abuse, and violence) seen as higher priority</li> <li>• potential staff burnout with introduction of rapid testing</li> <li>• providing rapid HIV testing gets in the way of ability to take care of patients</li> </ul>                                                                                                                                                                                                   | <ul style="list-style-type: none"> <li>• ED too short-staffed to incorporate HIV testing</li> <li>• prioritizing other preventive screens when time is short</li> <li>• would result in neglect of other clinical responsibilities</li> <li>• HIV screening not relevant to the visit</li> <li>• HIV is not the reason for the patient's visit</li> <li>• visit is for palliative care</li> <li>• no blood test planned</li> </ul>                                                                  |
| Perception of Low HIV Prevalence or Patient Risk | Intrapersonal | <ul style="list-style-type: none"> <li>• few injection drug users and low HIV prevalence translates to low prioritization of HIV testing</li> <li>• HIV disease prevalence is too low</li> <li>• HIV is too rare to warrant routine testing</li> <li>• belief of low risk of HIV among patients</li> <li>• perception that patients do not engage in risk behaviors</li> <li>• lack of awareness of HIV as a problem</li> <li>• patient and staff perception of low risk for HIV</li> <li>• usual patients seen in family practice are seen as low risk for HIV</li> <li>• lack of epidemiological risk factors</li> <li>• belief of low risk of HIV among patients</li> <li>• low risk in established patients</li> </ul> | <ul style="list-style-type: none"> <li>• lack of acknowledgment that older adults can be at risk for HIV</li> <li>• assumptions of patient risk based on age and marital status</li> <li>• misperceptions of patients' risks for HIV</li> <li>• low risk based on patient's age</li> <li>• low risk due to patient's sexual orientation</li> <li>• perception regarding ED patients' risk for HIV</li> <li>• population seen as elderly and monogamous and therefore not at risk for HIV</li> </ul> |

|                                 |               |                                                                                                                                                                                                                                                                                                                                                                                                                                                                                                                                                                                                                                                                                                                                                                                                                                                                                                                                                                                                                                                                                      |                                                                                                                                                                                                                                                                                                                                                                                                                                                                                                                                                                                                                                                                                                                                                                                                                                                                       |
|---------------------------------|---------------|--------------------------------------------------------------------------------------------------------------------------------------------------------------------------------------------------------------------------------------------------------------------------------------------------------------------------------------------------------------------------------------------------------------------------------------------------------------------------------------------------------------------------------------------------------------------------------------------------------------------------------------------------------------------------------------------------------------------------------------------------------------------------------------------------------------------------------------------------------------------------------------------------------------------------------------------------------------------------------------------------------------------------------------------------------------------------------------|-----------------------------------------------------------------------------------------------------------------------------------------------------------------------------------------------------------------------------------------------------------------------------------------------------------------------------------------------------------------------------------------------------------------------------------------------------------------------------------------------------------------------------------------------------------------------------------------------------------------------------------------------------------------------------------------------------------------------------------------------------------------------------------------------------------------------------------------------------------------------|
|                                 |               | <ul style="list-style-type: none"> <li>• prevalence of HIV below CDC threshold for universal testing</li> </ul>                                                                                                                                                                                                                                                                                                                                                                                                                                                                                                                                                                                                                                                                                                                                                                                                                                                                                                                                                                      | <ul style="list-style-type: none"> <li>• incorrect assumptions about patients' risk status</li> </ul>                                                                                                                                                                                                                                                                                                                                                                                                                                                                                                                                                                                                                                                                                                                                                                 |
| Lack of Awareness of Guidelines | Intrapersonal | <ul style="list-style-type: none"> <li>• confusion about testing guidelines and regulations</li> <li>• lack of awareness of testing recommendations (CDC or other national organizations)</li> <li>• lack of awareness of recommendations on screening for veterans</li> <li>• lack of awareness of the New York HIV testing law</li> <li>• lack of awareness on recommended frequency of HIV screening</li> <li>• lack of awareness that effectiveness of testing on basis of patient risk factors has diminished</li> <li>• small practice not up to date on recommendations</li> <li>• unsure of when to repeat an HIV test</li> <li>• lack of consistent guidelines</li> <li>• need for guidelines to normalize testing</li> <li>• lack of data to support or justify routine HIV testing</li> <li>• lack of awareness of local/institutional policies relating to notification and linkage to care</li> <li>• did not receive information about the recommendation for increased uptake of HIV screening</li> <li>• routine HIV testing is not currently recommended</li> </ul> | <ul style="list-style-type: none"> <li>• belief that local policy or general medical council guidance discouraged testing</li> <li>• physicians not trained in HIV and/or infectious disease are still not aware of the testing guidelines and still think that testing requires extensive pre-test counseling by HIV-trained physicians or certified nursing assistants</li> <li>• lack of awareness of provider-initiated testing and counseling policy</li> <li>• perception of lack of cost-efficiency in testing low-risk established patients</li> <li>• lack of clinical HIV factors to warrant testing</li> <li>• lack of medical indication to test</li> <li>• policy to order HIV testing only when clinically warranted (e.g., not at patient request)</li> <li>• no medical indication for testing</li> <li>• lack of HIV symptom presentation</li> </ul> |

|                                                                 |                      |                                                                                                                                                                                                                                                                                                                                                                                                                                                                                                                                                                                                                                                                                                                                                                                                                                                                                                                                                                  |                                                                                                                                                                                                                                                                                                                                                                                                                                                                                                                                                                                                                                                                                                            |
|-----------------------------------------------------------------|----------------------|------------------------------------------------------------------------------------------------------------------------------------------------------------------------------------------------------------------------------------------------------------------------------------------------------------------------------------------------------------------------------------------------------------------------------------------------------------------------------------------------------------------------------------------------------------------------------------------------------------------------------------------------------------------------------------------------------------------------------------------------------------------------------------------------------------------------------------------------------------------------------------------------------------------------------------------------------------------|------------------------------------------------------------------------------------------------------------------------------------------------------------------------------------------------------------------------------------------------------------------------------------------------------------------------------------------------------------------------------------------------------------------------------------------------------------------------------------------------------------------------------------------------------------------------------------------------------------------------------------------------------------------------------------------------------------|
| <p>Perception of Patient Discomfort with/Reluctance to Test</p> | <p>Intrapersonal</p> | <ul style="list-style-type: none"> <li>• belief that patients would refuse testing</li> <li>• older people more likely to refuse testing</li> <li>• perception of patient fear of positive result</li> <li>• patient embarrassment</li> <li>• patient discomfort discussing HIV testing</li> <li>• patient refusal</li> <li>• putting people off visiting health care for fear of a positive HIV diagnosis</li> <li>• rapid testing increases patients' anxiety about HIV</li> <li>• the new guidelines increase patient fear</li> <li>• perceived patient reluctance to be tested</li> <li>• patient may feel that requesting an HIV test equates to admission of having done something "naughty"</li> <li>• dental faculty expressed concerns that patients react negatively to HIV screening and/or offers of HIV screening</li> <li>• anticipation of low acceptance of HIV testing in dental setting</li> <li>• patients not motivated to screen</li> </ul> | <ul style="list-style-type: none"> <li>• anticipation of low acceptance of HIV testing dental settings</li> <li>• patients would react negatively to HIV screening or offers of HIV screening in dental practices</li> <li>• patients accustomed to having blood test performed in a lab as impediment to rapid testing</li> <li>• patients' assumption that they were already being tested/Patients thinking that they didn't need to be tested until symptoms appear</li> <li>• fear of a positive result</li> <li>• mistrust of health care services by aboriginal populations</li> <li>• patient attitudes towards HIV screening</li> <li>• lack of patient support for oral rapid HIV test</li> </ul> |
| <p>Provider Discomfort Discussing HIV/Risk Behaviors</p>        | <p>Intrapersonal</p> | <ul style="list-style-type: none"> <li>• discomfort in raising the issue of HIV screening with patients</li> <li>• discomfort on the part of the physician or patient to discuss risk behaviors</li> <li>• discomfort talking to older adults about their sexual practices</li> <li>• discomfort discussing a sensitive topic</li> </ul>                                                                                                                                                                                                                                                                                                                                                                                                                                                                                                                                                                                                                         | <ul style="list-style-type: none"> <li>• discomfort discussing high risk behaviors with patients</li> <li>• discomfort discussing modes of HIV transmission</li> <li>• provider, patient, or community discomfort (including</li> </ul>                                                                                                                                                                                                                                                                                                                                                                                                                                                                    |



|                                                      |               |                                                                                                                                                                                                                                                                                                                                                                                                                                                                                                                                                                                                                                                                                                                                                                                               |                                                                                                                                                                                                                                                                                                                                                                                                                                                                                                                                              |
|------------------------------------------------------|---------------|-----------------------------------------------------------------------------------------------------------------------------------------------------------------------------------------------------------------------------------------------------------------------------------------------------------------------------------------------------------------------------------------------------------------------------------------------------------------------------------------------------------------------------------------------------------------------------------------------------------------------------------------------------------------------------------------------------------------------------------------------------------------------------------------------|----------------------------------------------------------------------------------------------------------------------------------------------------------------------------------------------------------------------------------------------------------------------------------------------------------------------------------------------------------------------------------------------------------------------------------------------------------------------------------------------------------------------------------------------|
|                                                      |               | <ul style="list-style-type: none"> <li>• female general practitioners report more difficulty discussing sexual health with men</li> <li>• hard to find the right question and time to discuss sexual health (phrasing questions so as not to be offensive)</li> <li>• inadequate training on taking sexual history</li> <li>• difficulty initiating discussions about sexual behaviors (particularly with men - women often discuss needs for contraception, Pap tests, and pregnancy, which more readily lead into discussions about sexual health)</li> <li>• discomfort asking patients about sexual behaviors</li> <li>• discomfort counseling about sex and sexuality</li> <li>• embarrassment on the part of the family practitioner</li> <li>• unsure how to initiate topic</li> </ul> | <p>discomfort discussing sexual health)</p> <ul style="list-style-type: none"> <li>• discomfort initiating discussions about HIV</li> <li>• discomfort introducing an HIV test when there is no link with the patients' request</li> <li>• available continuing medical education courses do not adequately address sexual health</li> <li>• discomfort talking to older adults about their sexual practices</li> <li>• registered nurses did not feel well-equipped to discuss patient's risk of HIV or answer patient questions</li> </ul> |
| Lack of Self-Efficacy Providing Positive Test Result | Intrapersonal | <ul style="list-style-type: none"> <li>• anxiety about managing a positive diagnosis</li> <li>• fear of negative patient reaction to positive test result</li> <li>• inability to provide support to patients who may have intense emotional reaction to a positive HIV test</li> <li>• discomfort delivering the test results</li> <li>• not trained to handle positive HIV results</li> <li>• physicians ill-equipped to deal with emotional reactions</li> </ul>                                                                                                                                                                                                                                                                                                                           | <ul style="list-style-type: none"> <li>• uncertainty with knowing how to deal with emotional response if patient tests positive</li> <li>• uncomfortable giving a positive HIV test result</li> <li>• difficulty breaking news of positive HIV diagnoses</li> <li>• difficulty in delivering a positive test obtained through a rapid test result</li> <li>• lack of provider emotional preparedness to</li> </ul>                                                                                                                           |

|                                      |               |                                                                                                                                                                                                                                                                                                                                                                                                                                                                                                                                                                                                                                                                                                                                                                                                                                                                                                                                                                                                         |                                                                                                                                                                                                                                                                                                                                                                                                                                                                                                                                                                                                                                                                                                                                           |
|--------------------------------------|---------------|---------------------------------------------------------------------------------------------------------------------------------------------------------------------------------------------------------------------------------------------------------------------------------------------------------------------------------------------------------------------------------------------------------------------------------------------------------------------------------------------------------------------------------------------------------------------------------------------------------------------------------------------------------------------------------------------------------------------------------------------------------------------------------------------------------------------------------------------------------------------------------------------------------------------------------------------------------------------------------------------------------|-------------------------------------------------------------------------------------------------------------------------------------------------------------------------------------------------------------------------------------------------------------------------------------------------------------------------------------------------------------------------------------------------------------------------------------------------------------------------------------------------------------------------------------------------------------------------------------------------------------------------------------------------------------------------------------------------------------------------------------------|
|                                      |               | <ul style="list-style-type: none"> <li>• inability to provide clients necessary psychological support</li> <li>• psychological impact of having to give a positive test result</li> <li>• self-efficacy concerns - feeling inadequately trained to give positive results</li> </ul>                                                                                                                                                                                                                                                                                                                                                                                                                                                                                                                                                                                                                                                                                                                     | <ul style="list-style-type: none"> <li>• handle the number of positive results found</li> <li>• challenges presenting the test results (patient's feeling in case of a positive result)</li> </ul>                                                                                                                                                                                                                                                                                                                                                                                                                                                                                                                                        |
| Lack of Provider Knowledge about HIV | Intrapersonal | <ul style="list-style-type: none"> <li>• lack of education about HIV</li> <li>• lack of HIV-specific training</li> <li>• lack of knowledge and skills to offer screening and communicate the benefits of screening</li> <li>• lack of knowledge of benefits of treatment</li> <li>• lack of knowledge of HIV epidemiology (most common mode of transmission, percentage infected who are unaware, treatment as prevention, overall prevalence in Chicago)</li> <li>• lack of knowledge of presenting symptoms</li> <li>• lack of knowledge of value of screening</li> <li>• lack of medical education on HIV and aging</li> <li>• missing red flags for HIV</li> <li>• insufficient knowledge to provide HIV counseling and testing</li> <li>• staff members lack knowledge about HIV</li> <li>• concern about ability to answer patients' questions</li> <li>• not equipped to handle post positive result questions from family</li> <li>• patients may have questions staff cannot answer</li> </ul> | <ul style="list-style-type: none"> <li>• lack of awareness of HIV symptom presentation</li> <li>• lack of awareness of HIV as a problem</li> <li>• lack of training on HIV epidemiology and management of diagnosis</li> <li>• lack of education materials for implementing HIV testing</li> <li>• lack of consistent HIV training</li> <li>• lack of knowledge and skills on HIV prevention and treatment taught in schools</li> <li>• need for additional training</li> <li>• lack of training to assess risk behaviors</li> <li>• difficulty of accurately identifying those ED patients who are at greatest risk for HIV and most likely to have an undiagnosed infection</li> <li>• not conducting HIV risk assessment or</li> </ul> |

|                           |               |                                                                                                                                                                                                                                                                                                                                                                                                                                                                                                                                                                                                                                                                                                                                                                                                                                                                                                                                                                                                                                         |                                                                                                                                                                                                                                                                                                                                                                                                                                                                                                                                                                                                                                                                                             |
|---------------------------|---------------|-----------------------------------------------------------------------------------------------------------------------------------------------------------------------------------------------------------------------------------------------------------------------------------------------------------------------------------------------------------------------------------------------------------------------------------------------------------------------------------------------------------------------------------------------------------------------------------------------------------------------------------------------------------------------------------------------------------------------------------------------------------------------------------------------------------------------------------------------------------------------------------------------------------------------------------------------------------------------------------------------------------------------------------------|---------------------------------------------------------------------------------------------------------------------------------------------------------------------------------------------------------------------------------------------------------------------------------------------------------------------------------------------------------------------------------------------------------------------------------------------------------------------------------------------------------------------------------------------------------------------------------------------------------------------------------------------------------------------------------------------|
|                           |               | <ul style="list-style-type: none"> <li>• family practitioners unfamiliar with HIV</li> <li>• expertise not cultivated among general practitioners</li> <li>• failure to recognize symptoms of HIV</li> </ul>                                                                                                                                                                                                                                                                                                                                                                                                                                                                                                                                                                                                                                                                                                                                                                                                                            | <ul style="list-style-type: none"> <li>• providing sexual risk reduction education</li> <li>• providers relying on the use of pamphlets for education and focusing on reproductive health instead of HIV prevention</li> </ul>                                                                                                                                                                                                                                                                                                                                                                                                                                                              |
| Outside Scope of Practice | Intrapersonal | <ul style="list-style-type: none"> <li>• it is not my job</li> <li>• it is not appropriate to involve registered nurses in HIV screening</li> <li>• out of scope of practice</li> <li>• it is not considered part of professional role</li> <li>• perception that the health department is responsible for all HIV testing</li> <li>• providers see role as diagnostic, not preventive</li> <li>• routine HIV testing not the responsibility of ED staff</li> <li>• scope of practice constraints (HIV testing inappropriate in dentistry)</li> <li>• seeing HIV testing as only a diagnostic tool, not prevention</li> <li>• view that primary care is not the appropriate site for screening</li> <li>• counselors refused to test</li> <li>• physician refusal to perform testing</li> <li>• staff unwilling</li> <li>• HIV screening should be performed by primary care physicians rather than EDs</li> <li>• HIV testing as outside scope of dental practice (need to refer patients who test positive to a physician)</li> </ul> | <ul style="list-style-type: none"> <li>• burden of responsibility - provider uncertainty about extent of responsibility for HIV testing</li> <li>• difficulty treating chronic health conditions in the ED</li> <li>• providers do not believe it is their responsibility to offer HIV testing</li> <li>• fear that charging for HIV testing would be seen as "money making gimmick" for the dentist</li> <li>• not seen as physicians' responsibility</li> <li>• HIV as medical matter best addressed by physicians (not dentists)</li> <li>• detract from primary role of ED/ /PITC not seen as a nurse role</li> <li>• mission of ED is to treat acutely ill individuals (not</li> </ul> |

|                                |               |                                                                                                                                                                                                                                                                                                                                                                                                                                                                                                                                                                                                                                   |                                                                                                                                                                                                                                                                                                                                                                                                                                                                                                   |
|--------------------------------|---------------|-----------------------------------------------------------------------------------------------------------------------------------------------------------------------------------------------------------------------------------------------------------------------------------------------------------------------------------------------------------------------------------------------------------------------------------------------------------------------------------------------------------------------------------------------------------------------------------------------------------------------------------|---------------------------------------------------------------------------------------------------------------------------------------------------------------------------------------------------------------------------------------------------------------------------------------------------------------------------------------------------------------------------------------------------------------------------------------------------------------------------------------------------|
|                                |               | <p>anyway, so it is better for a physician to do the testing)</p> <ul style="list-style-type: none"> <li>• HIV testing would be taking funds from other health care settings</li> <li>• testing in ED may be seen as conflicting with interests of other community-based programs (which see HIV testing as their domain)</li> </ul>                                                                                                                                                                                                                                                                                              | <p>public health interests)</p> <ul style="list-style-type: none"> <li>• providers see role as diagnostic, not preventive</li> <li>• detracts from the primary role of ED</li> <li>• ED is for conditions that can be treated</li> <li>• HIV as a medical matter best addressed by physicians (not dentists)</li> </ul>                                                                                                                                                                           |
| Fear of Offending Patients     | Intrapersonal | <ul style="list-style-type: none"> <li>• afraid that broaching the topic would offend PTs</li> <li>• concern about upsetting patients and harming the patient-provider relationship</li> <li>• patient may be offended if offered HIV testing</li> <li>• patient likely to react to recommendation with denial or anger (I'm not gay, I don't feel sick)</li> <li>• personal relationship with patient (feeling that patient would not want them to know)</li> <li>• provider initiated testing and counseling may affect the trust between patient and professional</li> <li>• fear of appearing judgmental or racist</li> </ul> | <ul style="list-style-type: none"> <li>• fear that patients would accuse them of xenophobia</li> <li>• application of provider-initiated testing and counseling to sub-Saharan African migrants seen as discriminatory</li> <li>• fear of disrupting patient-provider relationship</li> <li>• belief that African-American patients are more likely to react to recommendations with denial, offense, or anger (I am not gay; I don't feel sick, I don't like needles or giving blood)</li> </ul> |
| Patient Perception of Low-Risk | Intrapersonal | <ul style="list-style-type: none"> <li>• patient reluctance due to low perceived risk</li> <li>• patients may not accurately assess or convey their own risks</li> </ul>                                                                                                                                                                                                                                                                                                                                                                                                                                                          | <ul style="list-style-type: none"> <li>• patient felt themselves to be at low risk</li> <li>• patients do not feel screening is appropriate</li> </ul>                                                                                                                                                                                                                                                                                                                                            |

|                                                 |                      |                                                                                                                                                                                                                                                                                                                                                                                                                                                                                                                                                                                                                                                                                                                                                                                                                                                                                                                                                                                                                                                                                                |
|-------------------------------------------------|----------------------|------------------------------------------------------------------------------------------------------------------------------------------------------------------------------------------------------------------------------------------------------------------------------------------------------------------------------------------------------------------------------------------------------------------------------------------------------------------------------------------------------------------------------------------------------------------------------------------------------------------------------------------------------------------------------------------------------------------------------------------------------------------------------------------------------------------------------------------------------------------------------------------------------------------------------------------------------------------------------------------------------------------------------------------------------------------------------------------------|
| <p>Lack of Familiarity with Test Procedures</p> | <p>Intrapersonal</p> | <ul style="list-style-type: none"> <li>• lack of experience with HIV screening</li> <li>• lack of familiarity with mechanics of performing rapid test</li> <li>• lack of knowledge of test availability</li> <li>• more education and training are needed to perform role in the rapid HIV testing program</li> <li>• lack of risk assessment skills</li> <li>• lack of self-confidence in ability to implement an evidence-based practice at their work</li> <li>• lack of self-efficacy in performing HIV testing</li> <li>• procedures are too difficult to learn</li> </ul> <ul style="list-style-type: none"> <li>• procedures for running the tests are difficult to learn</li> <li>• complexity of oral HIV tests</li> <li>• complexity of ordering an HIV test</li> <li>• difficulty of procedures in ordering an HIV test</li> <li>• lack of awareness of the types of tests available and their specificity and sensitivity</li> <li>• unsure how to perform the test</li> <li>• no experience offering HIV testing prior to policy change</li> </ul>                                |
| <p>HIV Relegated to Specialists</p>             | <p>Intrapersonal</p> | <ul style="list-style-type: none"> <li>• assumption that HIV care is provided only by specialists</li> <li>• belief that specialists are adequately meeting needs</li> <li>• staff not qualified</li> <li>• uncertainty about counseling patients (need to have someone with experience present)</li> <li>• belief that a HIV screen requires pre-screen counseling from a specialist</li> <li>• providers need special qualifications to inform patients of a positive test result</li> <li>• providers need special qualifications to suggest an HIV test</li> <li>• belief that testing requires extensive pretest counseling</li> </ul> <ul style="list-style-type: none"> <li>• non-laboratory staff are not qualified to run rapid tests</li> <li>• pregnancy diagnosed (testing deferred to prenatal visit)</li> <li>• HIV testing "not an ordinary prescription"</li> <li>• inability to screen concomitantly for other STIs</li> <li>• "scattershot approach" – it is up to each local program to make referral arrangements for HIV testing among substance abuse clients</li> </ul> |

|                                   |               |                                                                                                                                                                                                                                                                                                                                                                                                                                                                                                                  |                                                                                                                                                                                                                                                                                                                                                                                                                            |
|-----------------------------------|---------------|------------------------------------------------------------------------------------------------------------------------------------------------------------------------------------------------------------------------------------------------------------------------------------------------------------------------------------------------------------------------------------------------------------------------------------------------------------------------------------------------------------------|----------------------------------------------------------------------------------------------------------------------------------------------------------------------------------------------------------------------------------------------------------------------------------------------------------------------------------------------------------------------------------------------------------------------------|
|                                   |               | <ul style="list-style-type: none"> <li>by HIV-trained physicians or clinical nurse specialists</li> <li>limited access to testing for substance abusers</li> </ul>                                                                                                                                                                                                                                                                                                                                               | <ul style="list-style-type: none"> <li>provider-deferred testing to an upcoming prenatal appointment</li> </ul>                                                                                                                                                                                                                                                                                                            |
| Concerns about Cost-Effectiveness | Intrapersonal | <ul style="list-style-type: none"> <li>concerns about cost effectiveness</li> <li>lack of cost-effectiveness of universal ED-based HIV screening</li> <li>difference in opinion regarding efficacy of routine HIV testing</li> <li>already high rate of HIV testing (little added benefit to testing all patients)</li> <li>belief that sufficient infrastructure is in place (no added benefit to expanded screening)</li> <li>belief in importance of risk-based testing (due to limited resources)</li> </ul> | <ul style="list-style-type: none"> <li>HIV testing should be offered only to those with risk factors</li> <li>believing that it is not efficient to test every person</li> <li>decreased clinic efficiency with introduction of rapid testing</li> <li>lack of outcome expectancy</li> <li>it is not feasible or desirable to adopt provider-initiated testing and counseling during all types of consultations</li> </ul> |
| Additional Training Needed        | Intrapersonal | <ul style="list-style-type: none"> <li>additional training necessary to be able to offer HIV testing</li> <li>lack of training on how to perform rapid test</li> <li>staff reluctant to attend new trainings</li> <li>unsure how to perform the test</li> <li>inadequate staff training</li> <li>lack of self-confidence in their ability to implement an evidence-based practice at their work</li> <li>concern about ability to answer patients' questions</li> </ul>                                          | <ul style="list-style-type: none"> <li>general practitioners' expertise not cultivated</li> <li>lack of training in how to offer routine testing</li> <li>procedures are too difficult to learn</li> <li>lack of participation of other professional training</li> <li>lack of training on provider-initiated testing and counseling</li> </ul>                                                                            |

|                                                |               |                                                                                                                                                                                                                                                                                                                                                                                                                                                                                                                                                                                                                                                                            |                                                                                                                                                                                                                                                                                                                                                                                                                                                                                                                       |
|------------------------------------------------|---------------|----------------------------------------------------------------------------------------------------------------------------------------------------------------------------------------------------------------------------------------------------------------------------------------------------------------------------------------------------------------------------------------------------------------------------------------------------------------------------------------------------------------------------------------------------------------------------------------------------------------------------------------------------------------------------|-----------------------------------------------------------------------------------------------------------------------------------------------------------------------------------------------------------------------------------------------------------------------------------------------------------------------------------------------------------------------------------------------------------------------------------------------------------------------------------------------------------------------|
| Patient Acuity                                 | Intrapersonal | <ul style="list-style-type: none"> <li>• patient acuity</li> <li>• patient ineligibility (illness/inability to consent/age &gt; 5 years)</li> <li>• patient felt too ill to test</li> <li>• visit acuity</li> <li>• client too anxious, angry, or confused</li> <li>• cognitive difficulties among cancer patients</li> <li>• belief among some staff that HIV testing should be done 1-3 days after intake and not during the intake itself (inmates may refuse testing at intake because they are tired, hungry, or in alcohol/drug withdrawal)</li> <li>• focus on palliative care during visit</li> <li>• no blood test planned for cancer patients</li> </ul>         | <ul style="list-style-type: none"> <li>• client fragility - introducing HIV testing could threaten clients' substance abuse recovery</li> <li>• may jeopardize client's sobriety</li> <li>• dealing with difficult patient</li> <li>• low patient general and health literacy</li> <li>• rapid testing increases patient's anxiety about HIV</li> <li>• difficult to fit rapid test to patients with low literacy skills</li> <li>• lack of clear understanding of what they are being treated for and why</li> </ul> |
| Lack of Support for HIV as Public Health Issue | Intrapersonal | <ul style="list-style-type: none"> <li>• opposition to the increasing number of “public health” or “primary care” services being taken on by EDs</li> <li>• assuming that providers do not care about prevention and just want to treat disease</li> <li>• belief that being HIV positive is not deserving of "special status" to morally obligate a provider to offer free testing</li> <li>• belief that services offered should reflect needs of population being served (other public health needs more prevalent)</li> <li>• HIV competes with other state public health priorities</li> <li>• lack of integration between public health and ED department</li> </ul> | <ul style="list-style-type: none"> <li>• need for strong and committed advocate or spokesperson at top levels of government to heighten awareness of HIV as public health issue</li> <li>• patients may not test if focus too much on public health (versus individual) benefit</li> <li>• lack of HIV awareness and activism within community</li> <li>• lack of public health infrastructure</li> <li>• competing public health interest in ED</li> </ul>                                                           |

|                               |               |                                                                                                                                                                                                                                                                                                                                                                                                                                                                                                                       |                                                                                                                                                                                                                                                                                                                                                                                                                          |
|-------------------------------|---------------|-----------------------------------------------------------------------------------------------------------------------------------------------------------------------------------------------------------------------------------------------------------------------------------------------------------------------------------------------------------------------------------------------------------------------------------------------------------------------------------------------------------------------|--------------------------------------------------------------------------------------------------------------------------------------------------------------------------------------------------------------------------------------------------------------------------------------------------------------------------------------------------------------------------------------------------------------------------|
|                               |               | <ul style="list-style-type: none"> <li>• difficulty identifying and testing hard to reach populations (e.g., domestic violence victims, sex workers, undocumented immigrants)</li> </ul>                                                                                                                                                                                                                                                                                                                              | <ul style="list-style-type: none"> <li>• lack of dissemination and implementation strategies for HIV testing programs</li> <li>• patients at risk do not present to general practice</li> </ul>                                                                                                                                                                                                                          |
| False Positive Results        | Intrapersonal | <ul style="list-style-type: none"> <li>• concern about high false positive in low risk group</li> <li>• unnecessary fear on the part of patient who receives a false positive result</li> <li>• greater confidence in standard HIV testing with serology than rapid testing</li> <li>• unnecessarily raising alarm in patient</li> </ul>                                                                                                                                                                              | <ul style="list-style-type: none"> <li>• preference to order a conventional (blood) test simultaneously rather than offer a rapid test</li> <li>• concern about liability for inaccurate test results</li> </ul>                                                                                                                                                                                                         |
| Forgetting                    | Intrapersonal | <ul style="list-style-type: none"> <li>• forgetting to test</li> <li>• lack of reminder for HIV testing in EMR</li> <li>• forgot to offer</li> </ul>                                                                                                                                                                                                                                                                                                                                                                  | <ul style="list-style-type: none"> <li>• staff forgetting to implement HIV screening</li> </ul>                                                                                                                                                                                                                                                                                                                          |
| Disagree with Recommendations | Intrapersonal | <ul style="list-style-type: none"> <li>• disagree with recommendations</li> <li>• distrust of CDC over professional society recommendations</li> <li>• doubts about the guidelines (belief that data do not support the need for testing)</li> <li>• evidence for recommendations insufficient</li> <li>• questions of ethics or morality of testing patients as young as 13</li> <li>• uncertainty about organization issuing guidelines</li> <li>• lack of provider buy-in</li> <li>• nursing resistance</li> </ul> | <ul style="list-style-type: none"> <li>• intermittent staff compliance with guidelines</li> <li>• resistance to guidelines</li> <li>• being HIV positive is not deserving of "special status" to morally obligate a provider to offer free testing</li> <li>• lack of endorsement of recommendations among residents</li> <li>• not all nurses were convinced about provider-initiated testing and counseling</li> </ul> |



|                                    |               |                                                                                                                                                                                                                                                                                                                                                                                                                                                                                                                           |                                                                                                                                                                                                                                                                                                                                                              |
|------------------------------------|---------------|---------------------------------------------------------------------------------------------------------------------------------------------------------------------------------------------------------------------------------------------------------------------------------------------------------------------------------------------------------------------------------------------------------------------------------------------------------------------------------------------------------------------------|--------------------------------------------------------------------------------------------------------------------------------------------------------------------------------------------------------------------------------------------------------------------------------------------------------------------------------------------------------------|
|                                    |               | <ul style="list-style-type: none"> <li>• belief in importance of risk-based testing (due to limited resources)</li> <li>• guidelines do not address patient preferences, needs, and abilities</li> </ul>                                                                                                                                                                                                                                                                                                                  | <p>guidance to minimize</p> <ul style="list-style-type: none"> <li>• perception that HIV testing should be offered only to those with risk factors</li> </ul>                                                                                                                                                                                                |
| Testing Seen as Coercive           | Intrapersonal | <ul style="list-style-type: none"> <li>• belief that opt-out testing may be seen as coercive to patients</li> <li>• potential for provider-initiated testing and counseling to breach human rights (patients may feel pressurized or coerced into having a test)</li> <li>• concerns about opt-out testing</li> <li>• patients need to be able to make an informed decision</li> <li>• patients may not be able to fully participate in consent process during ED visits or understand meaning of test results</li> </ul> | <ul style="list-style-type: none"> <li>• immediacy of rapid test seen as too intrusive</li> <li>• involuntary commitment to treatment</li> <li>• screening for HIV among undocumented immigrants seen as unethical if patients are deported and no longer have access to care</li> <li>• patients may feel pressure or coerced into having a test</li> </ul> |
| Testing Not a Priority to Patients | Intrapersonal | <ul style="list-style-type: none"> <li>• HIV testing not a priority to most patients (most patients are low income - concerned more about where they will sleep and where they will get their next meal)</li> <li>• ignorance of rapid testing among patients</li> <li>• patient assumption that there were already being tested</li> <li>• patient lack of time</li> </ul>                                                                                                                                               | <ul style="list-style-type: none"> <li>• patient focus on immediate needs (what brought them to the ED)</li> <li>• patients not motivated to screen</li> <li>• test is offered in a manner that patients more likely to refuse (offered at the end of the ED visit)</li> <li>• unsure if patients want to be tested</li> </ul>                               |
| Patients Should Request Screening  | Intrapersonal | <ul style="list-style-type: none"> <li>• belief that patients should request test</li> <li>• patient should raise topic</li> <li>• patients do not request testing</li> </ul>                                                                                                                                                                                                                                                                                                                                             | <ul style="list-style-type: none"> <li>• fear of offering unneeded tests</li> <li>• reliance on patient request for screening</li> </ul>                                                                                                                                                                                                                     |

|                                                     |               |                                                                                                                                                                                        |                                                                                                                                                                                     |
|-----------------------------------------------------|---------------|----------------------------------------------------------------------------------------------------------------------------------------------------------------------------------------|-------------------------------------------------------------------------------------------------------------------------------------------------------------------------------------|
|                                                     |               | <ul style="list-style-type: none"> <li>• failure to truly perform universal testing may give patients a false sense of security that they have been tested and are negative</li> </ul> | <ul style="list-style-type: none"> <li>• instead of providers bringing up HIV to their patient, the patient should bring up the topic</li> </ul>                                    |
| Patient Fear of Needles                             | Intrapersonal | <ul style="list-style-type: none"> <li>• not ordering HIV testing for patients who do not like needle sticks</li> <li>• patient fear of needles</li> </ul>                             | <ul style="list-style-type: none"> <li>• patient discomfort with finger stick of venipuncture</li> </ul>                                                                            |
| Lack of Efficacy of Test to Change Patient Behavior | Intrapersonal | <ul style="list-style-type: none"> <li>• perceptions regarding testing's ability to cause patients to change their risk behaviors and lower transmission risk</li> </ul>               | <ul style="list-style-type: none"> <li>• provider belief that patients are not likely to change behaviors even if risks identified and testing and counseling is offered</li> </ul> |
